# Supplementary material
Source: ML conference proceedings conference paper supplement (https://openreview.net/forum?id=iF7MnXnxRw)

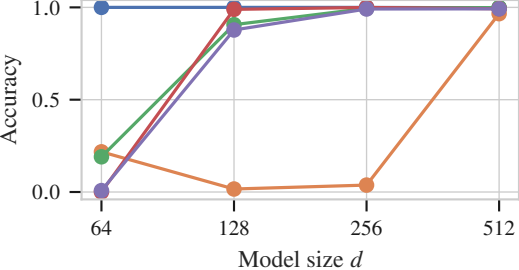

Supplement: supplementary_material [file attachment]

L: 64, KV-pairs: 4

L: 128, KV-pairs: 8

L: 256, KV-pairs: 1

L: 512, KV-pairs: 64

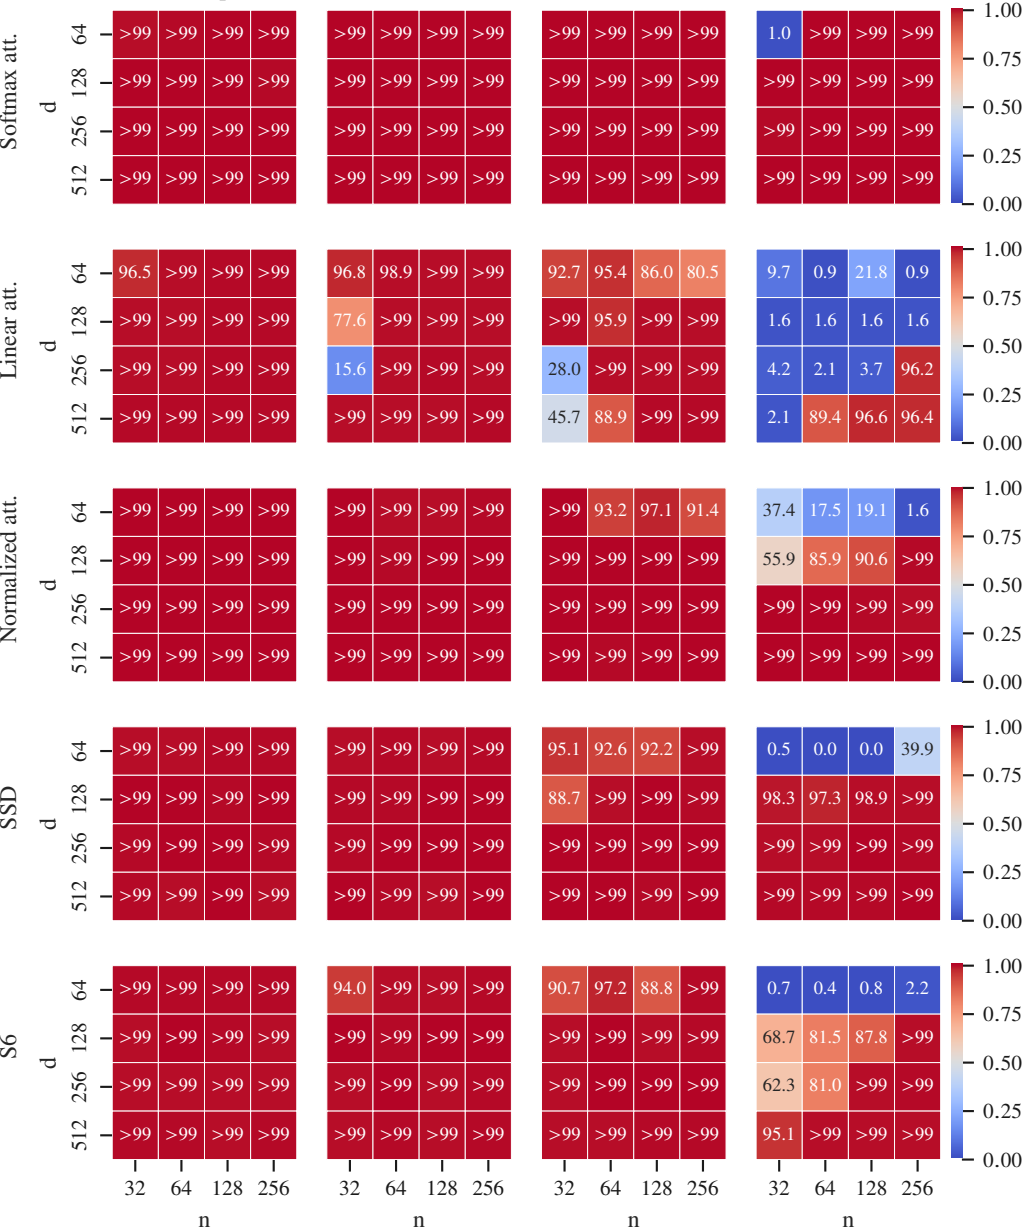

Supplement: supplementary_material [file attachment]

L: 256, KV-pairs: 16

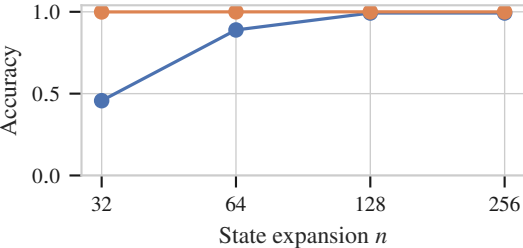

L: 512, KV-pairs: 64

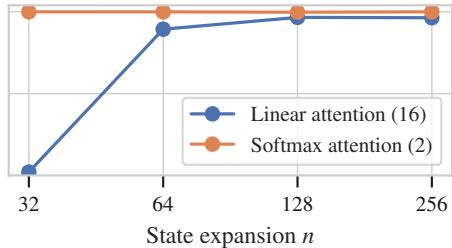

Supplement: supplementary_material [file attachment]

L: 64, KV-pairs: 4

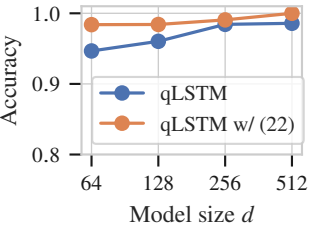

L: 128, KV-pairs: 8

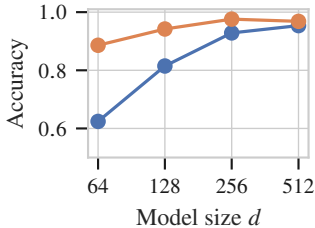

L: 256, KV-pairs: 16

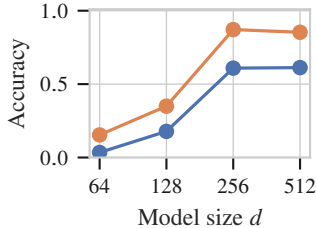

Supplement: supplementary_material [file attachment]
